# Supplementary material for: AI-derived epicardial fat measurements improve cardiovascular risk prediction from myocardial perfusion imaging
Source: PubMed Central journal article supplement (PMC10838293; doi:10.1038/s41746-024-01020-z), 2024-02-03
Supplement: 41746_2024_1020_MOESM1_ESM.pdf [file 41746_2024_1020_MOESM1_ESM.pdf]

## SUPPLEMENTAL MATERIAL

### EAT volume N=100

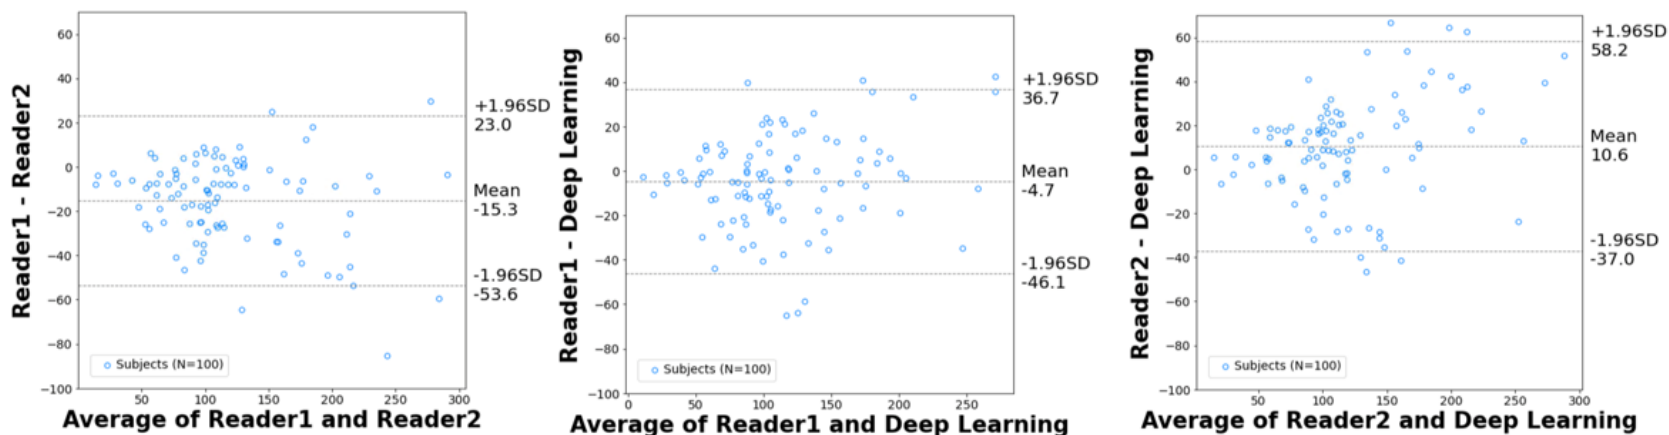

### EAT attenuation N=100

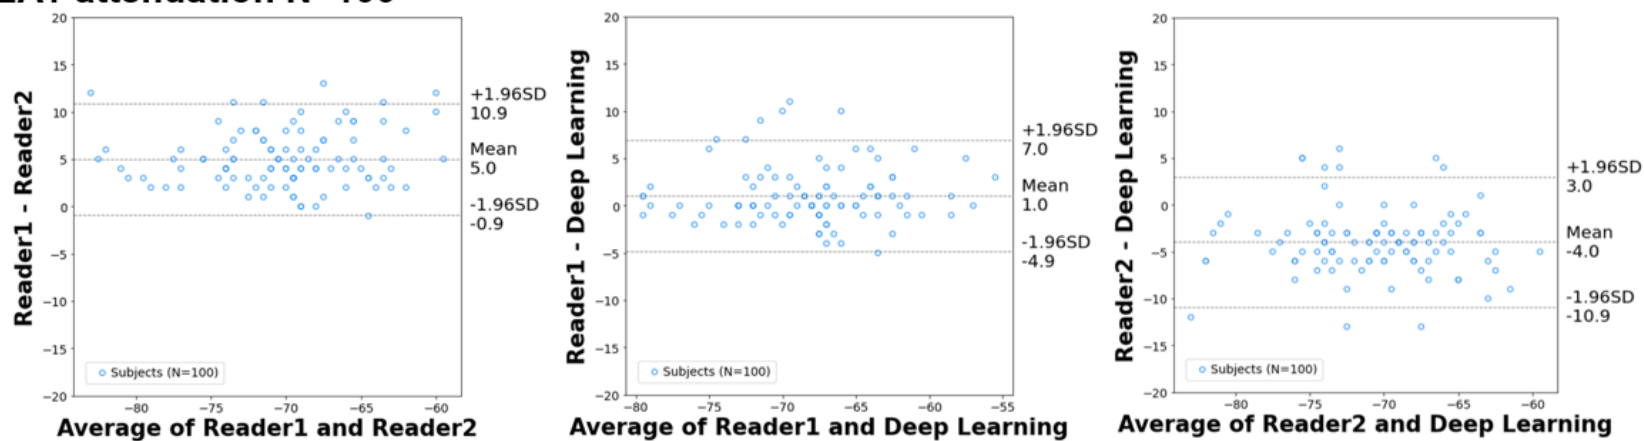

Supplemental Figure 1: Bland-Altman plots comparing measurements of epicardial adipose tissue volume and attenuation between two expert readers and deep learning. The mean bias for EAT volume for deep learning was intermediate between the two readers, with similar limits of agreement. Similar results were seen for median EAT attenuation. 1.96 standard deviation (SD) implies the 95% confidence intervals.

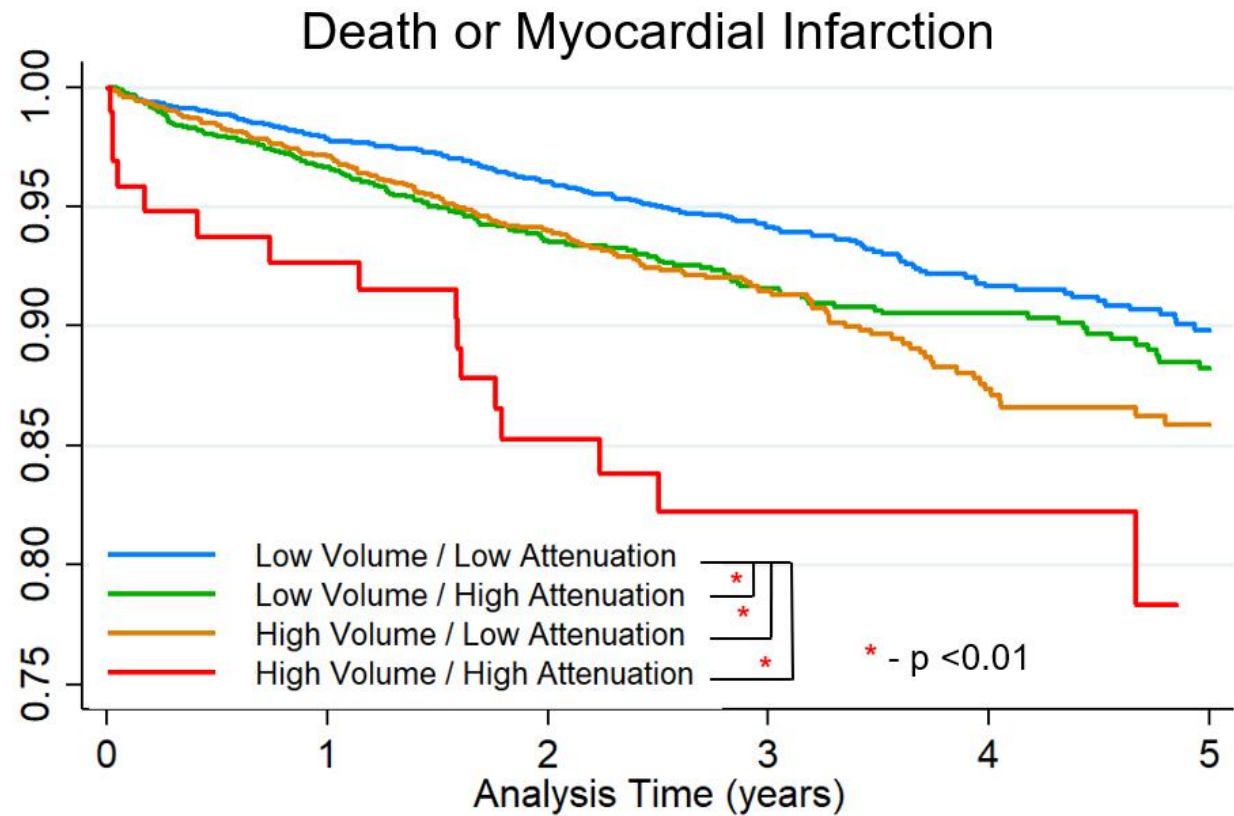

#### Number at risk

|                                |      |      |      |      |     |     |
|--------------------------------|------|------|------|------|-----|-----|
| Low Volume/ Low Attenuation    | 4052 | 3507 | 2442 | 1422 | 697 | 384 |
| Low Volume / High Attenuation  | 2037 | 1738 | 1208 | 784  | 498 | 302 |
| High Volume / Low Attenuation  | 2094 | 1810 | 1241 | 717  | 359 | 200 |
| High Volume / High Attenuation | 98   | 85   | 64   | 39   | 26  | 12  |

Supplemental Figure 2: Kaplan-Meier curves for death or myocardial infarction stratified by epicardial adipose tissue (EAT) volume and attenuation in the combined internal and external testing population.

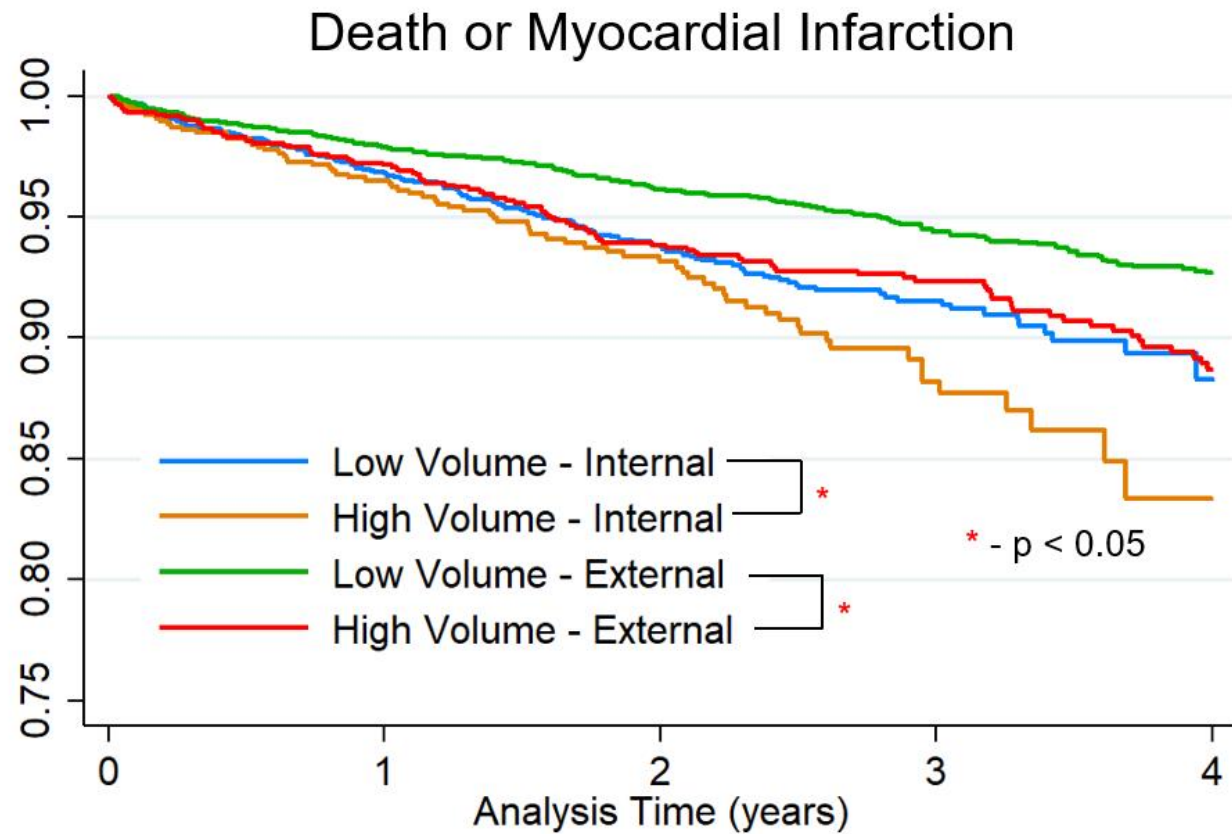

|                            | Number at risk |      |      |      |      |
|----------------------------|----------------|------|------|------|------|
|                            | 0              | 1    | 2    | 3    | 4    |
| Low EAT Volume - Internal  | 2610           | 2058 | 1250 | 543  | 64   |
| High EAT Volume - Internal | 901            | 716  | 438  | 180  | 18   |
| Low EAT Volume - External  | 3479           | 3187 | 2400 | 1663 | 1131 |
| High EAT Volume - External | 1291           | 1179 | 867  | 576  | 367  |

Supplemental Figure 3: Kaplan-Meier curves for death or myocardial infarction stratified by epicardial adipose tissue (EAT) volume. The threshold for elevated EAT volume (>144 mL) was established in the internal testing population.

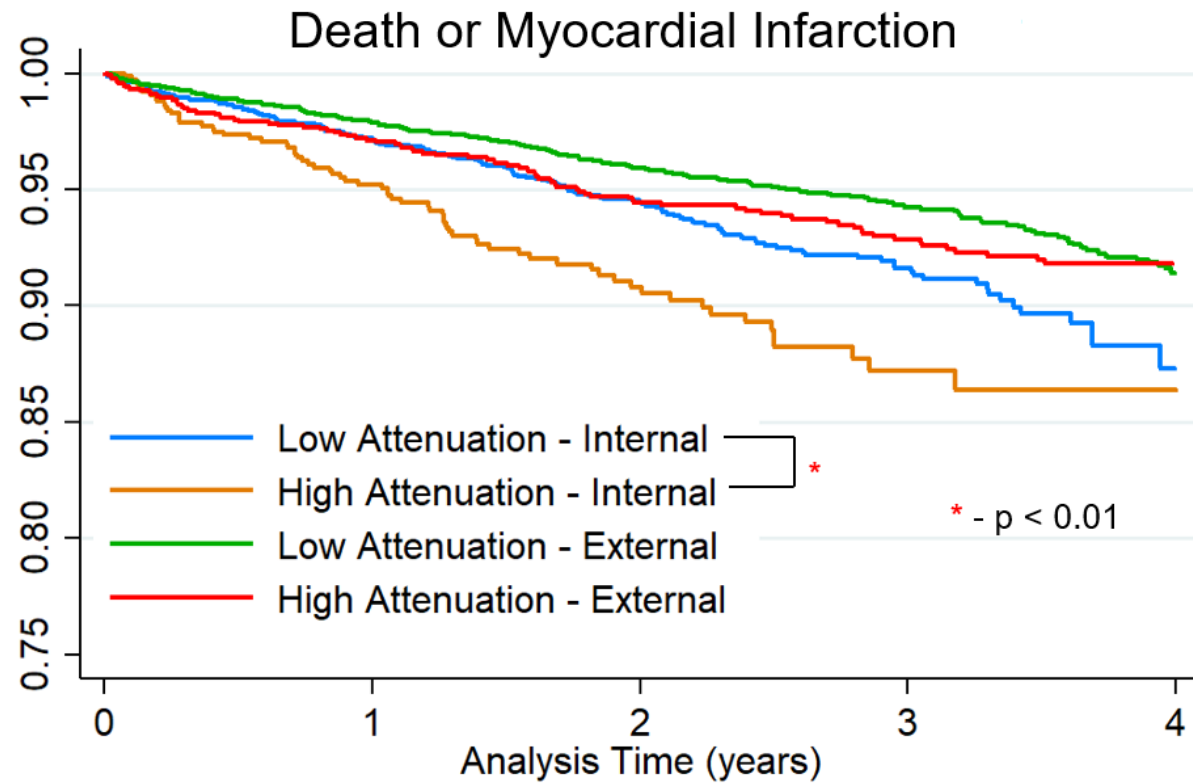

|                             | 0    | 1    | 2    | 3    | 4   |
|-----------------------------|------|------|------|------|-----|
| Low Attenuation - Internal  | 2711 | 2158 | 1344 | 587  | 65  |
| High Attenuation - Internal | 800  | 616  | 344  | 136  | 17  |
| Low Attenuation - External  | 3435 | 3159 | 2339 | 1552 | 991 |
| High Attenuation - External | 1335 | 1207 | 928  | 687  | 507 |

Supplemental Figure 4: Kaplan-Meier curves for death or myocardial infarction stratified by epicardial adipose tissue (EAT) attenuation. The threshold for elevated EAT attenuation ( $> -64$  Hounsfield Units) was established in the internal testing population.

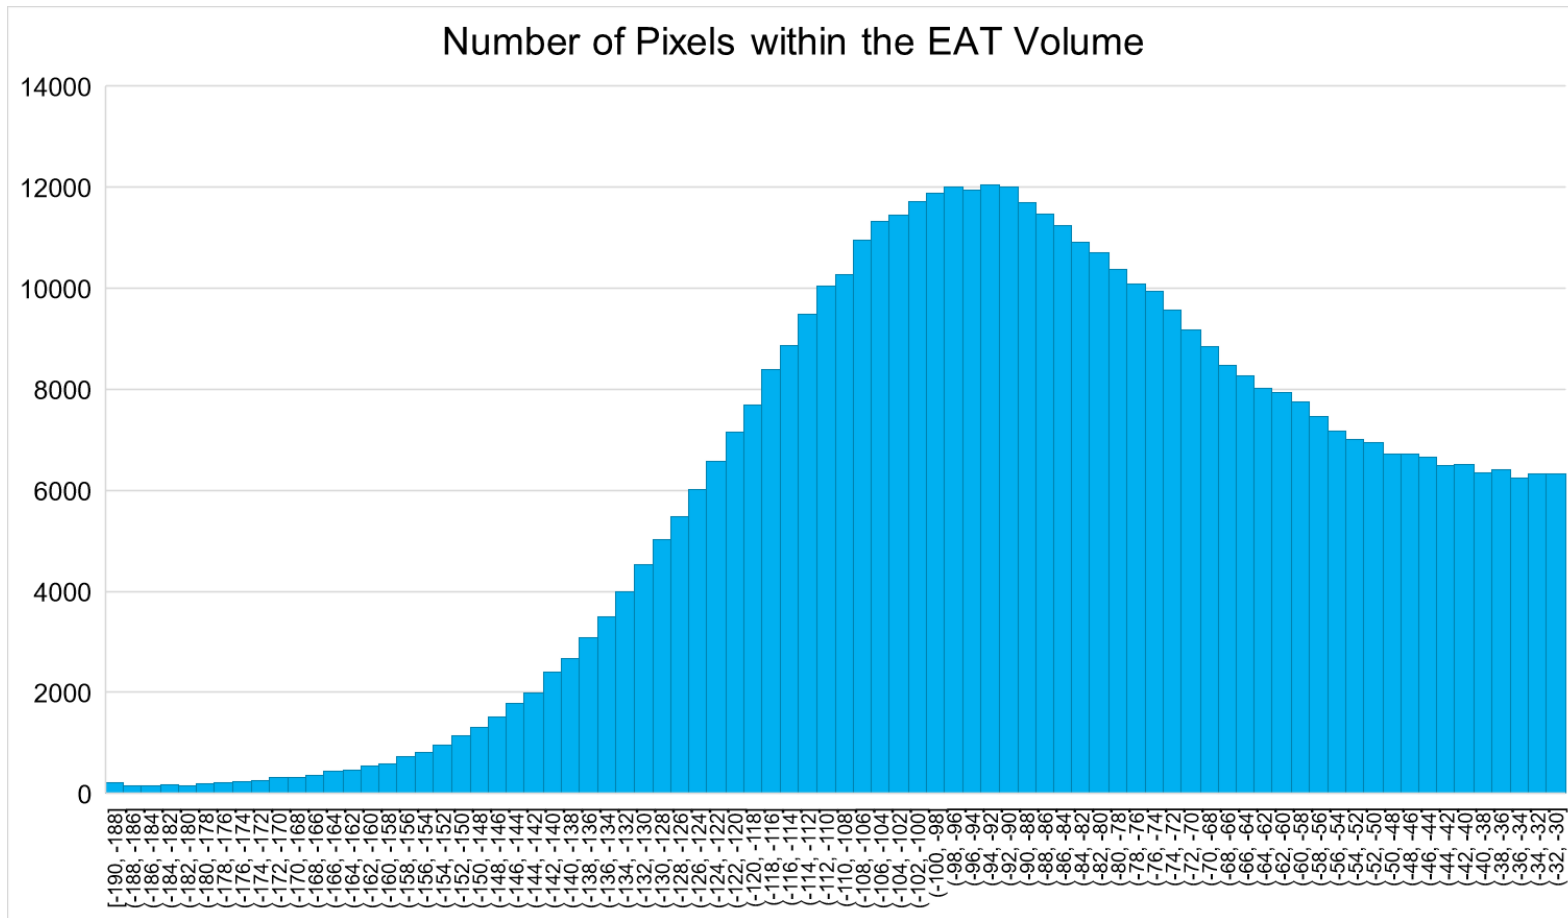

Supplemental Figure 5: Epicardial adipose tissue (EAT) attenuation values for all pixels in a 50-year-old woman with a body mass index of 30.3. The total EAT volume was 130 mL and the median EAT attenuation was -88 Hounsfield Units.

| Factor                              | Training Population<br>(n=500) | Internal Testing<br>Population<br>(n=3511) | p-value |
|-------------------------------------|--------------------------------|--------------------------------------------|---------|
| Age, median (IQR)                   | 66.5 (58, 74)                  | 63 (55, 72)                                | <0.001  |
| Male, n (%)                         | 308 (61.6%)                    | 1764 (50.2%)                               | <0.001  |
| Body mass index, median (IQR)       | 28.6 (25.5 – 33.1)             | 29.5 (25.5 – 34.2)                         | 0.042   |
| Hypertension, n (%)                 | 349 (70.1%)                    | 2099 (59.8%)                               | <0.001  |
| Diabetes Mellitus, n (%)            | 146 (29.3%)                    | 829 (23.6%)                                | 0.005   |
| Dyslipidemia, n (%)                 | 297 (59.6%)                    | 1698 (48.4%)                               | <0.001  |
| Family History, n (%)               | 66 (13.3%)                     | 536 (15.3%)                                | 0.240   |
| Smoking, n (%)                      | 98 (19.7%)                     | 696 (19.8%)                                | 0.940   |
| Race                                |                                |                                            | 0.047   |
| White                               | 355 (71.4%)                    | 2213 (63.1%)                               |         |
| Black or African American           | 91 (18.3%)                     | 772 (22.0%)                                |         |
| American Indian or Alaska Native    | 3 (0.6%)                       | 11 (0.3%)                                  |         |
| Asian                               | 8 (1.6%)                       | 99 (2.8%)                                  |         |
| Native Hawaiian or Pacific Islander | 0 (0.0%)                       | 9 (0.3%)                                   |         |
| Other Race / Declined to Disclose   | 43 (8.6%)                      | 407 (11.6%)                                |         |
| EAT Volume, median (IQR)            | 106.7 (76.1, 151.4)            | 100.9 (70.8, 145.5)                        | 0.041   |
| EAT Attenuation, median (IQR)       | -70 (-75, -65)                 | -69 (-74, -65)                             | 0.150   |

Supplemental Table 1: Characteristics of the training and testing populations. EAT – epicardial adipose tissue, IQR – interquartile range.

|                                      | No Death or MI<br>(n=7716) | Death or MI<br>(n=565) | p-value |
|--------------------------------------|----------------------------|------------------------|---------|
| Age, median (IQR)                    | 64 (56, 72)                | 70 (61, 77)            | <0.001  |
| Male, n (%)                          | 3834 (49.7%)               | 332 (58.8%)            | <0.001  |
| BMI, median (IQR)                    | 30.2 (26, 34.9)            | 28.4 (24.4, 33.5)      | <0.001  |
| Hypertension, n (%)                  | 4518 (58.6%)               | 347 (61.4%)            | 0.184   |
| Diabetes Mellitus, n (%)             | 1951 (25.3%)               | 192 (34.0%)            | <0.001  |
| Dyslipidemia, n (%)                  | 3532 (45.8%)               | 261 (46.2%)            | 0.861   |
| Family History, n (%)                | 1936 (25.0%)               | 112 (19.8%)            | 0.005   |
| Smoking, n (%)                       | 1142 (14.8%)               | 100 (17.7%)            | 0.067   |
| Stress TPD, median (IQR)             | 3.0 (1.0, 6.7)             | 4.0 (1.5, 8.6)         | <0.001  |
| Stress LVEF, median (IQR)            | 65.5 (57.4, 73.3)          | 60.1 (48.6, 68.9)      | <0.001  |
| DL CAC score, median (IQR)           | 13 (0,230)                 | 176 (11, 966)          | <0.001  |
| EAT volume, median (IQR)             | 103.2 (71.2, 146.3)        | 108.6 (74.3, 161.9)    | 0.011   |
| High EAT volume, n (%)               | 2004 (26.0%)               | 188 (33.3%)            | <0.001  |
| Median EAT attenuation, median (IQR) | -69 (-73, -64)             | -68 (-72, -63)         | 0.045   |
| High median EAT attenuation, n (%)   | 1959 (25.4%)               | 176 (31.2%)            | 0.003   |

Supplemental Table 2. Patient characteristics in patients who experienced major adverse cardiovascular events (MACE) compared to those who did not. BMI – body mass index, CAC – coronary artery calcium, DL – deep learning, EAT – epicardial adipose tissue, IQR – interquartile range, LVEF – left ventricular ejection fraction, MI – myocardial infarction, TPD – total perfusion deficit.
